# Supplementary material for: Preparation of polycarbonate diols (PCDLs) from dimethyl carbonate (DMC) and diols catalyzed by KNO3/γ-Al2O3
Source: Royal Society of Chemistry journal article supplement (doi:10.1039/c8ra07141a), 2018-01-01
Supplement: c8ra07141a1.pdf [file c8ra07141a1.pdf]

## Supporting Information

### Preparation of polycarbonate diols (PCDLs) from dimethyl carbonate (DMC) and diols catalyzed by $\text{KNO}_3/\text{gamma-Al}_2\text{O}_3$

Menglu Song,<sup>a,b</sup> Xiangui Yang<sup>\*a</sup> and Gongying Wang<sup>a</sup>

<sup>a</sup>Chengdu Institute of Organic Chemistry, Chinese Academy of Sciences, Chengdu 610041, Sichuan, China

<sup>b</sup>National Engineering Laboratory & Technology, University of Chinese Academy of Sciences, Beijing 101408, China

## 1 Experimental

Differential Scanning Calorimetry (DSC) tests were carried out on a TA Instrument DSC-Q20 thermal analyzer under nitrogen atmosphere. The samples were loaded in aluminum pans, heated to 120 °C and kept for 5min to remove thermal history, then were cooled to -80 °C at a rate of 10 °C min<sup>-1</sup>, and finally were reheated to 120 °C at the same rate. From the second heating run, the glass transition temperature ( $T_g$ ) and melting temperature ( $T_m$ ) of the copolymers of polycarbonate diols was obtained.

## 2 Results

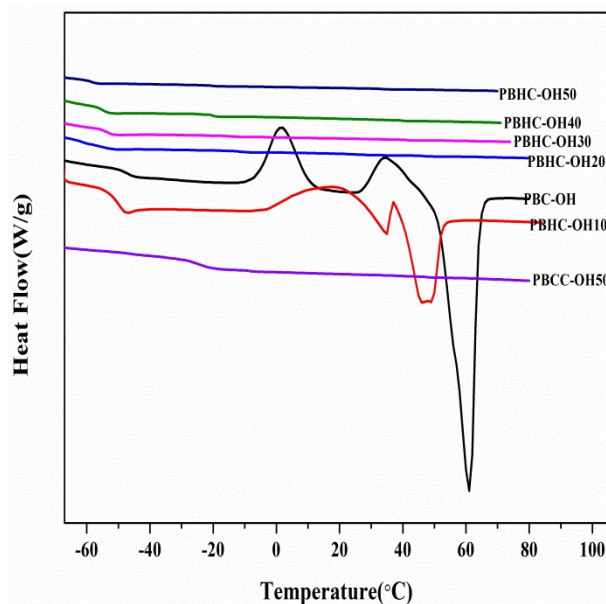

Fig S1 DSC traces of synthesized polycarbonate diols
